# Supplementary material
Source: PubMed Central journal article supplement (PMC3574193)
Supplement: NIHMS438180-supplement-1_si_001.pdf [file NIHMS438180-supplement-1_si_001.pdf]

## SUPPORTING INFORMATION

### **Selective Inhibition of Extracellular Thioredoxin by Asymmetric Disulfides**

Thomas R. DiRaimondo<sup>1</sup>, Nicholas M. Plugis<sup>2</sup>, Xi Jin<sup>2</sup>, Chaitan Khosla<sup>1,2</sup>

Departments of <sup>1</sup>Chemical Engineering and <sup>2</sup>Chemistry,

Stanford University, Stanford CA 94305

Address correspondence to: Chaitan Khosla ([khosla@stanford.edu](mailto:khosla@stanford.edu))

## SUPPLEMENTAL FIGURES

**Figure S1:**

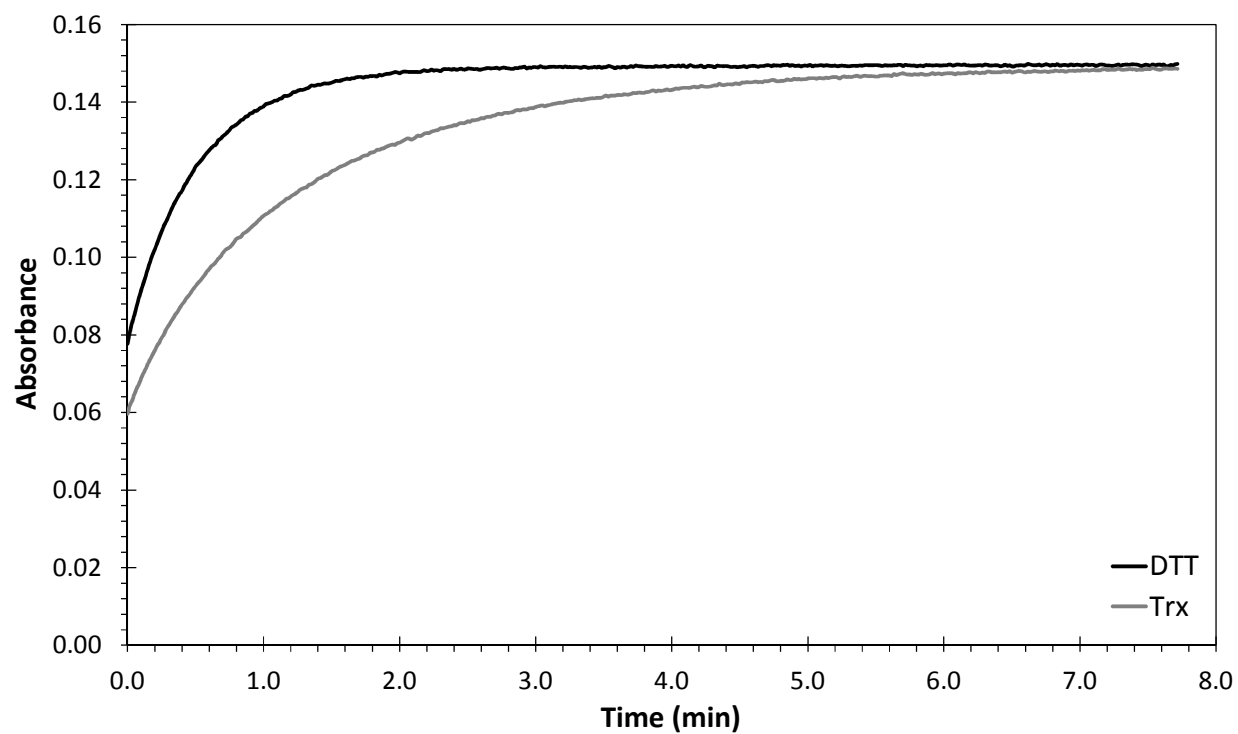

**Figure S1:** Time course of the reaction between 10 μM PX-12 and either 250 μM DTT or 10 μM Trx, measured at 252 nm. Reactions were performed in 0.1 M citrate-phosphate buffer at pH 6.

**Figure S2:**

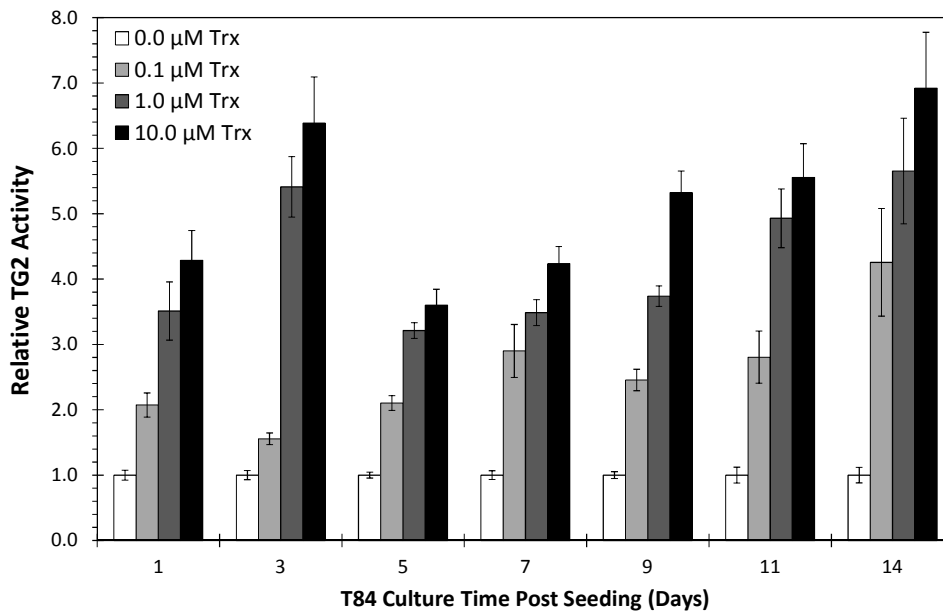

**Figure S2:** Effect of maturity of T84 monolayers on Trx-mediated TG2 activation. T84 cells were grown for 1-14 days post-seeding, and treated with 0-10  $\mu\text{M}$  recombinant human Trx and 200  $\mu\text{M}$  5BP for 3 h. Following removal of all well contents, cells were washed, fixed, washed, and blocked as described in the Experimental Methods. Horseradish peroxidase conjugated streptavidin was used to quantify the amount of extracellular 5BP incorporation. TG2 activity is normalized to the activity observed in the absence of any Trx at the corresponding time point. Experiments were performed in triplicate Values reported are averages +/- standard errors.

Figure S3:

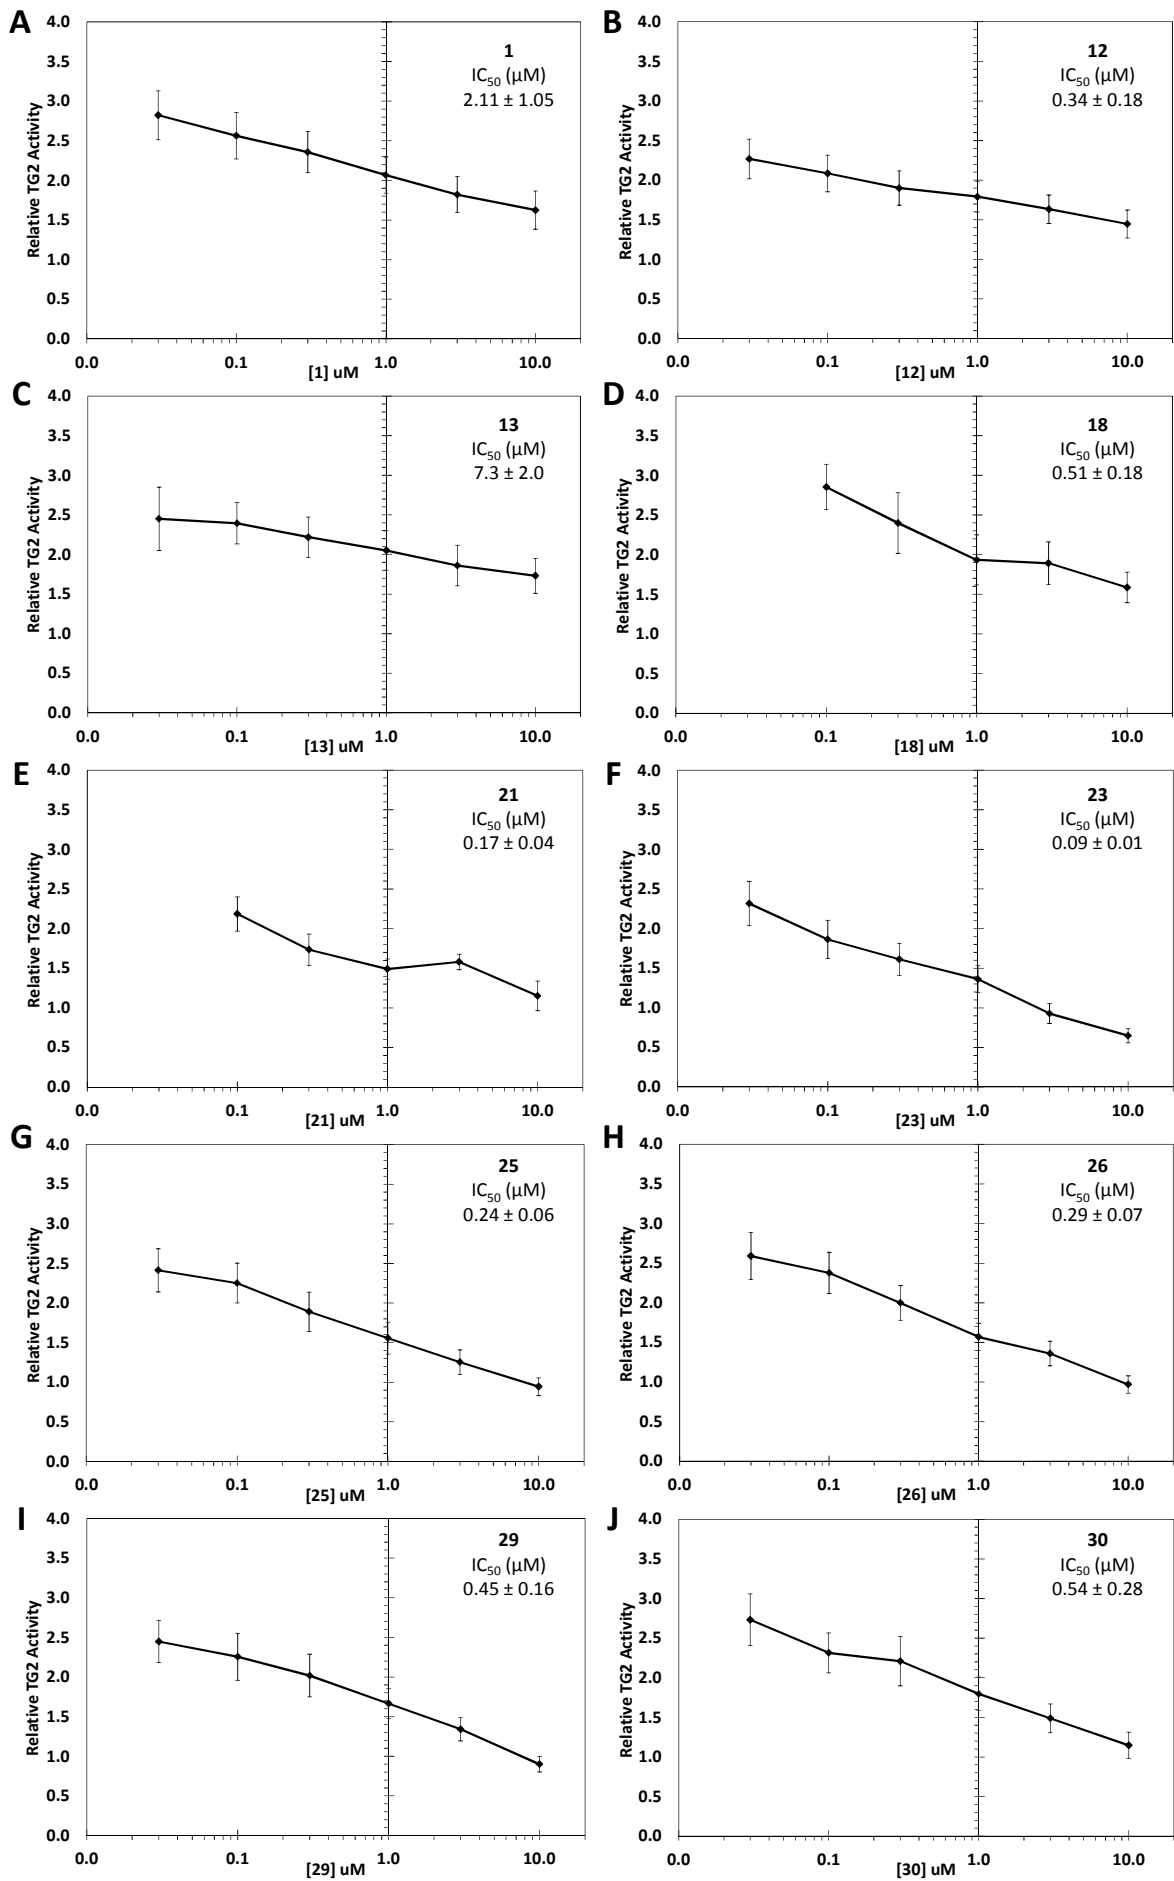

**Figure S3:** Inhibition of Trx mediated TG2 activation in T84 enterocytes via asymmetric disulfides. Recombinant human Trx was added to T84 cells, as described in the experimental methods section. T84 cells were treated with 0.03  $\mu$ M Trx, 200  $\mu$ M 5BP, and 0-10  $\mu$ M compounds (A) **1**, (B) **12**, (C) **13**, (D) **18**, (E) **21**, (F) **23**, (G) **25**, (H) **26**, (I) **29**, and (J) **30** for 3 h. Following removal of all well contents, cells were washed, fixed, washed, and blocked as described in the Experimental Methods. Horseradish peroxidase conjugated streptavidin was used to probe the amount of extracellular 5BP incorporation. TG2 activity is normalized to the activity observed in the absence of any exogenous Trx. IC<sub>50</sub> values reported were calculated using linear regressions of TG2 activity versus logarithmic inhibitor concentration. Experiments were performed in triplicate. Values reported are averages +/- standard errors.

**SUPPLEMENTAL TABLE**

**Table S1:** Comparison of the reactivity ( $k_{inh}/K_i$ ) of selected inhibitors against Trx versus bimolecular rate constant against DTT, glutathione, and cysteine.

| Inhibitor Structure                                                                 | Compound  | Trx $k_{inh}/K_i$<br>( $\mu\text{M}^{-1}\text{min}^{-1}$ ) | Trx/<br>DTT | Trx/<br>Glutathione | Trx/<br>Cysteine |
|-------------------------------------------------------------------------------------|-----------|------------------------------------------------------------|-------------|---------------------|------------------|
| 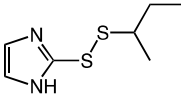   | <b>1</b>  | 0.076                                                      | 7           | 6                   | 4                |
|    | <b>18</b> | 0.031                                                      | 52          | 150                 | 51               |
|    | <b>21</b> | 0.14                                                       | 200         | 120                 | 79               |
|    | <b>23</b> | 0.34                                                       | 170         | 180                 | 95               |
|    | <b>24</b> | 0.27                                                       | 110         | 64                  | 45               |
|   | <b>25</b> | 0.076                                                      | 150         | 210                 | 130              |
|  | <b>26</b> | 0.072                                                      | 120         | 60                  | 40               |
|  | <b>27</b> | 0.089                                                      | 74          | 37                  | 21               |
|  | <b>28</b> | 0.16                                                       | 65          | 52                  | 52               |
|  | <b>29</b> | 0.087                                                      | 73          | 36                  | 29               |
|  | <b>30</b> | 0.18                                                       | 42          | 33                  | 23               |
